**Table S1.** *Post hoc* comparison of rheotaxis between LL+ and LL- fish

| Flow<br>(cm s <sup>-1</sup> ) | Species    | Contrast Estimate<br>(RI <sub>LL+</sub> - RI <sub>LL-</sub> ) ± 95%<br>C.I. | S.E.         | t(df)            | Adj.<br>Sig. |
|-------------------------------|------------|-----------------------------------------------------------------------------|--------------|------------------|--------------|
| 0                             | TLC        | -0.056 ± 0.183                                                              | 0.090        | -0.625(31)       | 0.537        |
|                               | BCF        | -0.021 ± 0.159                                                              | 0.078        | -0.274(32)       | 0.786        |
| <b>1</b>                      | <b>TLC</b> | <b>0.269 ± 0.146</b>                                                        | <b>0.072</b> | <b>3.727(38)</b> | <b>0.001</b> |
|                               | BCF        | -0.049 ± 0.127                                                              | 0.063        | -0.781(38)       | 0.439        |
| <b>2</b>                      | <b>TLC</b> | <b>0.245 ± 0.169</b>                                                        | <b>0.083</b> | <b>2.948(35)</b> | <b>0.006</b> |
|                               | BCF        | -0.100 ± 0.147                                                              | 0.072        | -1.384(35)       | 0.175        |
| 3                             | TLC        | -0.001 ± 0.138                                                              | 0.068        | -0.010(41)       | 0.992        |
|                               | BCF        | -0.019 ± 0.121                                                              | 0.060        | -0.315(41)       | 0.754        |
| 4                             | TLC        | 0.012 ± 0.113                                                               | 0.056        | 0.206(41)        | 0.838        |
|                               | BCF        | 0.016 ± 0.100                                                               | 0.050        | 0.325(41)        | 0.747        |
| 6                             | TLC        | 0.074 ± 0.104                                                               | 0.052        | 1.424(38)        | 0.862        |
|                               | BCF        | -0.008 ± 0.090                                                              | 0.044        | -0.176(35)       | 0.862        |
| 0                             | TLC        | 0.069 ± 0.104                                                               | 0.050        | 1.374(22)        | 0.183        |
|                               | BCF        | -0.019 ± 0.092                                                              | 0.044        | -0.431(21)       | 0.671        |
| 10                            | TLC        | 0.033 ± 0.107                                                               | 0.052        | 0.638(20)        | 0.530        |
|                               | BCF        | -0.008 ± 0.094                                                              | 0.045        | -0.172(20)       | 0.865        |

Pairwise comparisons of rheotactic performance (RI) between LL+ and LL- individuals for both corydoras (TLC) and blind cavefish (BCF). Dunn-sidak corrections were used to control for experimentwise error. Bold rows indicate significance. Contrast estimates represent the actual difference between the two groups (i.e. RI<sub>LL+</sub> - RI<sub>LL-</sub>)

**Table S2.** Boundary layer thickness as a function of flow speed, characteristic length and associated local Reynolds number

| <b>Flow Speed<br/>(cm s<sup>-1</sup>)</b> | <b>Characteristic<br/>Length (cm)</b> | <b>Local 'Re'</b> | <b>BL (cm)</b> |
|-------------------------------------------|---------------------------------------|-------------------|----------------|
| 1                                         | 25                                    | 2500              | 2.5            |
| 2                                         | 25                                    | 5000              | 1.8            |
| 4                                         | 25                                    | 10000             | 1.25           |
| 8                                         | 25                                    | 20000             | 0.9            |
| 10                                        | 25                                    | 25000             | 0.8            |
| 1                                         | 50                                    | 5000              | 3.5            |
| 2                                         | 50                                    | 10000             | 2.5            |
| 4                                         | 50                                    | 20000             | 1.8            |
| 8                                         | 50                                    | 40000             | 1.25           |
| 10                                        | 50                                    | 50000             | 1.1            |
